# Supplementary material for: Perceptions of Neurosurgery among Medical Students and Interns: A National Cross-Sectional Study
Source: MDPI journal article supplement (doi:10.3390/medicina58081120), 2022-08-18
Supplement: s1 [file s1]

**Table S1. Comparisons of students (Interns and students) views with items (strongly agree and agree combined)**

| <b>Comparisons of students (Interns and medical students) views with items<br/>(strongly agree and agree combined)</b> |       |
|------------------------------------------------------------------------------------------------------------------------|-------|
| <i>I would consider a career in neurosurgery</i>                                                                       |       |
| Medical Students                                                                                                       | 40.2% |
| Interns                                                                                                                | 26.6% |
| <i>Neurosurgery training programs are the most competitive to get into</i>                                             |       |
| Medical Students                                                                                                       | 52.9% |
| Interns                                                                                                                | 51.0% |
| <i>Adventure loving persons are best suited to do neurosurgery specialization</i>                                      |       |
| Medical Students                                                                                                       | 41.1% |
| Interns                                                                                                                | 36.2% |
| <i>College teachers/seniors have a great influence on any students' specialization choice after MBBS.</i>              |       |
| Medical Students                                                                                                       | 65.4% |
| Interns                                                                                                                | 65.0% |
| <i>Future neurosurgical specialty job opportunities in Saudi Arabia are limited</i>                                    |       |
| Medical Students                                                                                                       | 34.4% |
| Interns                                                                                                                | 40.9% |
| <i>Huge prestige is attached to neurosurgery</i>                                                                       |       |
| Medical Students                                                                                                       | 71.1% |
| Interns                                                                                                                | 71.9% |
| <i>Neurosurgeons are intelligent</i>                                                                                   |       |
| Medical Students                                                                                                       | 74.1% |
| Interns                                                                                                                | 68.0% |
| <i>Neurosurgeons are well paid</i>                                                                                     |       |
| Medical Students                                                                                                       | 54.9% |
| Interns                                                                                                                | 56.3% |
| <i>Neurosurgeons need excellent manual dexterity</i>                                                                   |       |
| Medical Students                                                                                                       | 83.7% |
| Interns                                                                                                                | 78.6% |
| <i>Neurosurgeons need to be emotionally detached from their patients</i>                                               |       |
| Medical Students                                                                                                       | 35.2% |
| Interns                                                                                                                | 43.0% |
| <i>Neurosurgery is a depressing specialty</i>                                                                          |       |
| Medical Students                                                                                                       | 38.7% |
| Interns                                                                                                                | 44.0% |
| <i>Neurosurgery is a dying specialty</i>                                                                               |       |

|                                                                                 |       |
|---------------------------------------------------------------------------------|-------|
| Medical Students                                                                | 29.4% |
| Interns                                                                         | 32.0% |
| <b>Neurosurgery is a male specialty</b>                                         |       |
| Medical Students                                                                | 24.4% |
| Interns                                                                         | 25.3% |
| <i>Neurosurgery is an important subject</i>                                     |       |
| Medical Students                                                                | 95.6% |
| Interns                                                                         | 94.3% |
| <b>Neurosurgery is an interesting specialty</b>                                 |       |
| Medical Students                                                                | 78.1% |
| Interns                                                                         | 75.8% |
| <i>Neurosurgery is more about technical skill than academic knowledge</i>       |       |
| Medical Students                                                                | 43.7% |
| Interns                                                                         | 40.9% |
| <i>Neurosurgery is/was taught as part of my undergraduate medical degree</i>    |       |
| Medical Students                                                                | 55.2% |
| Interns                                                                         | 65.6% |
| <b>Neurosurgery requires a long training period</b>                             |       |
| Medical Students                                                                | 89.0% |
| Interns                                                                         | 87.2% |
| <i>Neurosurgery requires long operating hours</i>                               |       |
| Medical Students                                                                | 85.1% |
| Interns                                                                         | 88.5% |
| <i>Neurosurgery rotation should be a compulsory rotation in internship</i>      |       |
| Medical Students                                                                | 45.1% |
| Interns                                                                         | 25.8% |
| <i>Neurosurgery should be taught as part of an undergraduate medical degree</i> |       |
| Medical Students                                                                | 70.3% |
| Interns                                                                         | 71.1% |
| <i>Neurosurgical illnesses are challenging and interesting</i>                  |       |
| Medical Students                                                                | 84.1% |
| Interns                                                                         | 81.3% |
| <i>Neurosurgical treatment does not cure the patients most of the times</i>     |       |
| Medical Students                                                                | 34.8% |
| Interns                                                                         | 40.9% |
| <i>Work as a neurosurgery specialist can impede family life</i>                 |       |
| Medical Students                                                                | 60.5% |
| Interns                                                                         | 63.0% |

**Table S2. Comparisons between interns who have neurosurgery exposure vs. interns who did not have exposure to neurosurgery.**

| Item                                                                                               | Yes (have exposure) |     |                | Have no exposure |     |                | p-value |
|----------------------------------------------------------------------------------------------------|---------------------|-----|----------------|------------------|-----|----------------|---------|
|                                                                                                    | Mean                | N   | Std. Deviation | Mean             | N   | Std. Deviation |         |
| Adventure loving persons are best suited to do neurosurgery specialization                         | 3.4                 | 163 | 1.0            | 3.3              | 432 | .9             | 0.16    |
| College teachers/seniors have a great influence on any students' specialization choice after MBBS. | 3.7                 | 163 | 1.1            | 3.7              | 432 | 1.0            | 0.98    |
| Future neurosurgical specialty job opportunities in Saudi Arabia are limited                       | 3.3                 | 163 | 1.1            | 3.4              | 432 | .9             | 0.73    |
| Huge prestige is attached to neurosurgery                                                          | 3.9                 | 163 | .9             | 4.0              | 432 | .9             | 0.28    |
| I would consider a career in neurosurgery                                                          | 2.9                 | 163 | 1.3            | 2.7              | 432 | 1.3            | 0.11    |
| Neurosurgeons are intelligent                                                                      | 3.9                 | 163 | 1.0            | 3.9              | 432 | .9             | 0.99    |
| Neurosurgeons are well paid                                                                        | 3.7                 | 163 | 1.0            | 3.7              | 432 | 1.0            | 0.83    |
| Neurosurgeons need excellent manual dexterity                                                      | 4.0                 | 163 | .9             | 4.1              | 432 | .9             | 0.10    |
| Neurosurgeons need to be emotionally detached from their patients                                  | 3.3                 | 163 | 1.2            | 3.2              | 432 | 1.1            | 0.18    |
| Neurosurgery is a depressing specialty                                                             | 3.5                 | 163 | 1.1            | 3.3              | 432 | 1.1            | 0.08    |
| Neurosurgery is a dying specialty                                                                  | 2.9                 | 163 | 1.2            | 3.0              | 432 | 1.1            | 0.29    |

|                                                                          |     |     |     |     |     |     |             |
|--------------------------------------------------------------------------|-----|-----|-----|-----|-----|-----|-------------|
| Neurosurgery is a male specialty                                         | 2.5 | 163 | 1.3 | 2.5 | 432 | 1.3 | 0.76        |
| Neurosurgery is an important subject                                     | 4.4 | 163 | .9  | 4.6 | 432 | .6  | <b>0.01</b> |
| Neurosurgery is an interesting specialty                                 | 3.9 | 163 | 1.0 | 3.9 | 432 | 1.1 | 0.47        |
| Neurosurgery is more about technical skill than academic knowledge       | 3.2 | 163 | 1.3 | 3.2 | 432 | 1.2 | 0.91        |
| Neurosurgery is/was taught as part of my undergraduate medical degree    | 3.9 | 163 | .9  | 3.7 | 432 | 1.1 | <b>0.01</b> |
| Neurosurgery requires a long training period                             | 4.2 | 163 | .8  | 4.3 | 432 | .7  | 0.39        |
| Neurosurgery requires long operating hours                               | 4.3 | 163 | .8  | 4.3 | 432 | .7  | 0.61        |
| Neurosurgery rotation should be a compulsory rotation in internship:     | 2.9 | 163 | 1.2 | 2.9 | 432 | 1.3 | 0.93        |
| Neurosurgery should be taught as part of an undergraduate medical degree | 4.0 | 163 | .9  | 3.8 | 432 | 1.1 | 0.10        |
| Neurosurgery training programs are the most competitive to get into.     | 3.5 | 163 | 1.1 | 3.5 | 432 | 1.1 | 0.75        |
| Neurosurgical illnesses are challenging and interesting                  | 4.0 | 163 | .9  | 4.0 | 432 | .9  | 0.57        |
| Neurosurgical treatment does not cure the patients most of the times     | 3.2 | 163 | 1.1 | 3.2 | 432 | 1.1 | 0.80        |
| Work as a neurosurgery specialist can impede family life                 | 3.8 | 163 | .9  | 3.8 | 432 | .8  | 0.86        |

|                                                                                                                            |     |     |    |     |     |    |      |
|----------------------------------------------------------------------------------------------------------------------------|-----|-----|----|-----|-----|----|------|
| Would you be interested in taking an elective rotation in neurosurgery to get more exposure of the neurosurgery specialty? | 1.6 | 163 | .5 | 1.6 | 432 | .5 | 0.42 |
|----------------------------------------------------------------------------------------------------------------------------|-----|-----|----|-----|-----|----|------|

**Table S3. Comparisons between Students who have neurosurgery exposure vs. students who did not have exposure to neurosurgery.**

| Item                                                                                               | Yes (Have Exposure) |           |       | No (No Exposure) |           |                | p-value      |
|----------------------------------------------------------------------------------------------------|---------------------|-----------|-------|------------------|-----------|----------------|--------------|
|                                                                                                    | Mean                | Frequency | SD    | Mean             | Frequency | Std. Deviation |              |
| Adventure loving persons are best suited to do neurosurgery specialization                         | 3.237               | 232       | 1.006 | 3.361            | 546       | 0.940          | 0.101        |
| College teachers/seniors have a great influence on any students' specialization choice after MBBS. | 3.871               | 232       | 1.011 | 3.683            | 546       | 1.080          | <b>0.024</b> |
| Future neurosurgical specialty job opportunities in Saudi Arabia are limited                       | 3.233               | 232       | 1.064 | 3.342            | 546       | 0.978          | 0.164        |
| Huge prestige is attached to neurosurgery                                                          | 3.970               | 232       | 0.918 | 4.051            | 546       | 0.899          | 0.251        |
| I would consider a career in neurosurgery                                                          | 2.677               | 232       | 1.452 | 2.952            | 546       | 1.374          | <b>0.012</b> |
| Neurosurgeons are intelligent                                                                      | 3.819               | 232       | 0.977 | 4.029            | 546       | 0.875          | <b>0.003</b> |
| Neurosurgeons are well paid                                                                        | 3.728               | 232       | 1.032 | 3.736            | 546       | 1.017          | 0.922        |
| Neurosurgeons need excellent manual dexterity                                                      | 4.017               | 232       | 0.949 | 4.192            | 546       | 0.870          | <b>0.013</b> |

|                                                                          |       |     |       |       |     |       |              |
|--------------------------------------------------------------------------|-------|-----|-------|-------|-----|-------|--------------|
| Neurosurgeons need to be emotionally detached from their patients        | 3.086 | 232 | 1.217 | 3.097 | 546 | 1.199 | 0.908        |
| Neurosurgery is a depressing specialty                                   | 3.250 | 232 | 1.104 | 3.223 | 546 | 1.127 | 0.762        |
| Neurosurgery is a dying specialty                                        | 2.871 | 232 | 1.136 | 2.982 | 546 | 1.175 | 0.224        |
| Neurosurgery is a male specialty                                         | 2.582 | 232 | 1.362 | 2.385 | 546 | 1.343 | 0.062        |
| Neurosurgery is an important subject                                     | 4.552 | 232 | 0.662 | 4.553 | 546 | 0.718 | 0.982        |
| Neurosurgery is an interesting specialty                                 | 3.892 | 232 | 1.053 | 4.068 | 546 | 1.057 | 0.034        |
| Neurosurgery is more about technical skill than academic knowledge       | 3.177 | 232 | 1.173 | 3.158 | 546 | 1.233 | 0.840        |
| Neurosurgery requires a long training period                             | 4.284 | 232 | 0.759 | 4.348 | 546 | 0.752 | 0.283        |
| Neurosurgery requires long operating hours                               | 4.224 | 232 | 0.745 | 4.324 | 546 | 0.729 | 0.082        |
| Neurosurgery rotation should be a compulsory rotation in internship:     | 2.978 | 232 | 1.327 | 3.172 | 546 | 1.278 | 0.056        |
| Neurosurgery should be taught as part of an undergraduate medical degree | 4.086 | 232 | 0.940 | 3.842 | 546 | 1.091 | <b>0.003</b> |
| Neurosurgery training programs are the most competitive to get into.     | 3.366 | 232 | 1.124 | 3.604 | 546 | 1.094 | <b>0.006</b> |
| Neurosurgical illnesses are                                              | 4.099 | 232 | 0.880 | 4.093 | 546 | 0.882 | 0.934        |

|                                                                                                                            |       |     |       |       |     |       |              |
|----------------------------------------------------------------------------------------------------------------------------|-------|-----|-------|-------|-----|-------|--------------|
| challenging and interesting                                                                                                |       |     |       |       |     |       |              |
| Neurosurgical treatment does not cure the patients most of the times                                                       | 2.974 | 232 | 1.116 | 3.176 | 546 | 1.071 | 0.018        |
| Work as a neurosurgery specialist can impede family life                                                                   | 3.849 | 232 | 0.862 | 3.777 | 546 | 0.893 | 0.295        |
| Would you be interested in taking an elective rotation in neurosurgery to get more exposure of the neurosurgery specialty? | 1.578 | 232 | 0.495 | 1.498 | 546 | 0.500 | <b>0.043</b> |

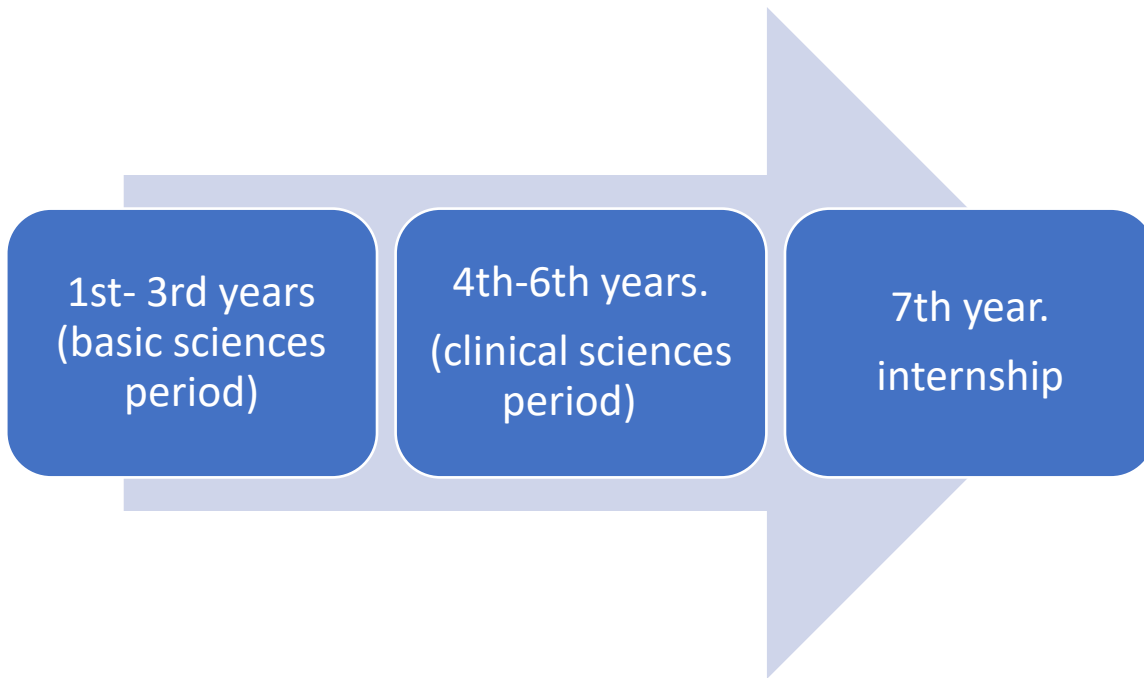

**Figure S1. diagram shows the 7-year-pathway of medical students in Saudi Arabia after graduation from high school.**
